1   Astrovirus Replication Is Inhibited by Nitazoxanide *In Vitro* and *In Vivo*

2

3   Virginia Hargest,<sup>1,2</sup> Bridgett Sharp,<sup>1</sup> Brandi Livingston,<sup>1</sup> Valerie Cortez,<sup>1</sup> and Stacey Schultz-  
4   Cherry<sup>1,\*</sup>

5

6   <sup>1</sup>Department of Infectious Diseases, St. Jude Children's Research Hospital, Memphis, TN, USA

7   <sup>2</sup>Department of Microbiology, Immunology, and Biochemistry, University of Tennessee Health  
8   Science Center, Memphis, TN, USA

9

10   Running Head: Nitazoxanide Inhibits Astrovirus Replication

11

12   \*Address correspondence to Stacey Schultz-Cherry, [stacey.schultz-cherry@stjude.org](mailto:stacey.schultz-cherry@stjude.org).

13

14   Abstract Word Count: 186

15   Text Word Count: 2749

16

17

18

19

20

21

22

23

24

25

26

## 27 **Abstract**

28 Astroviruses (AstV) are a leading cause of diarrhea especially in the very young, the elderly,  
29 and immunocompromised populations. Despite their significant impact on public health, no drug  
30 therapies for astrovirus have been identified. In this study we fill this gap in knowledge and  
31 demonstrate that the FDA-approved broad-spectrum anti-infective drug nitazoxanide (NTZ)  
32 blocks astrovirus replication *in vitro* with a 50% effective concentration (EC<sub>50</sub>) of approximately  
33 1.47µM. It can be administered up to 8 hours post-infection and is effective against multiple  
34 human astrovirus serotypes including clinical isolates. Most importantly, NTZ reduces viral shed  
35 and clinical disease (diarrhea) *in vivo*, exhibiting its potential as a future clinical therapeutic.

## 36 **Importance**

37 Human astroviruses (HAstV) are thought to cause between 2 and 9% of acute, non-bacterial  
38 diarrhea cases in children worldwide. HAstV infection can be especially problematic in  
39 immunocompromised people and infants where the virus has been associated with necrotizing  
40 enterocolitis, severe and persistent diarrhea, as well as systemic and often fatal disease. Yet no  
41 antivirals have been identified to treat astrovirus infection. Our study provides the first evidence  
42 that nitazoxanide may be an effective therapeutic strategy against astrovirus disease.

43

## 44 **Introduction**

45 Diarrheal disease is the second leading cause of death in children under 5 years of age,  
46 with nearly 1.7 billion cases and 525,000 deaths each year (1). Since their discovery in 1975,  
47 human astroviruses have consistently ranked among the leading causes of diarrhea worldwide  
48 (2). However, human astrovirus infections can range anywhere from asymptomatic to mild  
49 diarrhea and even fatal systemic disease (3, 4). Infections in immunocompetent individuals  
50 typically present as watery diarrhea that resolves within 1 to 3 days post-infection without the  
51 need for hospitalization (2). Astrovirus outbreaks frequently occur in assisted living facilities,  
52 hospitals and child care centers, where the young, elderly, and immunocompromised

53 populations are at risk of persistent diarrhea leading to wasting (5), and extra-gastrointestinal  
54 disease that requires medical intervention, including respiratory disease (6–10), and fatal  
55 encephalitis, and meningitis (11).

56 Despite its high prevalence and the risk of severe disease, no vaccines or drug  
57 treatments exist for astrovirus. Only oral or parenteral fluids and electrolytes available to prevent  
58 and treat dehydration caused by astrovirus-induced diarrhea. In these studies, we provide the  
59 first evidence that nitazoxanide (NTZ), an FDA-approved broad-spectrum anti-parasitic and anti-  
60 viral drug, inhibits the replication of multiple strains of human astrovirus *in vitro* even when  
61 administered up to 8 hours post-infection, and reduces viral shed and diarrhea *in vivo*. This work  
62 highlights the potential use of NTZ as an effective therapeutic strategy against astrovirus  
63 infection.

64

## 65 **Results**

66 **Nitazoxanide blocks astrovirus replication *in vitro* by inhibiting dsRNA production.** To  
67 identify an effective antiviral drug against astrovirus, human colon carcinoma (Caco-2) cells  
68 were infected with a laboratory strain of human astrovirus strain-1(HAstV-1) at a multiplicity of  
69 infection (MOI) of 1 before increasing concentrations of foscarnet, ribavirin, acyclovir,  
70 nitazoxanide or DMSO (vehicle control) were added 1 hour post-infection (hpi). Viral capsid  
71 protein levels were quantitated at 24 hpi by immunofluorescent microscopy as described (12).  
72 Foscarnet, ribavirin, and acyclovir failed to inhibit HAstV-1 replication even at concentrations of  
73 250  $\mu\text{M}$  (Figure 1a). In contrast, NTZ inhibited HAstV-1 replication in a dose-dependent manner  
74 with the 5  $\mu\text{M}$  treatment completely blocking virus replication (Figure1a-b). The 50% effective  
75 concentration was calculated as approximately 1.47  $\mu\text{M}$  (Figure 1c). Concentrations of NTZ  
76 above 5  $\mu\text{M}$  were associated with decreased cell viability as compared to vehicle alone (DMSO)  
77 (Figure 1d). Thus, subsequent studies were performed with NTZ at a concentration of 2.5  $\mu\text{M}$ .

78 To determine the stage of the viral replication cycle blocked by NTZ, drug was added at  
79 2, 4, 6, 8, and 12 hours after HAstV-1 infection and viral capsid expression quantitated (Figure  
80 2a). Addition of NTZ up to 8hpi completely inhibited HAstV-1 replication (Figure 2b) suggesting  
81 it blocks an early stage of the viral life cycle. Indeed, NTZ reduced the formation of double-  
82 strand RNA that occurs when the astrovirus genome is generated via its RNA-dependent RNA  
83 polymerase (Figure 2c). This method serves as a proxy for early replication given our lack of  
84 antibodies to the HAstV-1 non-structural proteins. Since NTZ appeared to exert antiviral activity  
85 early in the astrovirus replication cycle, we asked if NTZ activated any innate antiviral pathways.  
86 Previous research has shown thiazolidines, the active form of NTZ, up-regulate type I and II IFN  
87 (13), HAstV has already been shown to be sensitive to IFN treatment, where exogenous  
88 addition of IFN $\beta$  limited astrovirus replication in a dose-dependent manner (14). We treated  
89 Caco-2 cells with NTZ and looked for up-regulation of type I and III interferons (IFN). At 4 hours  
90 post NTZ treatment, the shortest amount of time in which NTZ still inhibits HAstV replication,  
91 IFN $\alpha$ , IFN $\beta$ , or IFN $\lambda$  were not significantly up-regulated compared to non-treated cells (Figure  
92 2f). This suggests that the induction of IFN is not the mechanism by which NTZ blocks HAstV  
93 replication.

94 Finally, we asked if NTZ was effective against multiple HAstV serotypes and clinical  
95 isolates. Briefly, Caco-2 cells were infected with four different lab-adapted HAstV serotypes  
96 (HAstV-1, 2, 6 and 8) and four clinical isolates SJ177.110 (HAstV-2), SJ60.212 (HAstV-8),  
97 SJ88123.E120 (HAstV-1), and SJ88027.E259 (HAstV-1) obtained from patient samples and  
98 treated with 2.5  $\mu$ M NTZ or DMSO (vehicle control). NTZ completely inhibited all HAstV isolates  
99 suggesting it is broadly protective against multiple HAstV serotypes (Figure 3a). Within the past  
100 decade, novel HAstV more closely related to animal AstV and associated with severe extra-  
101 gastrointestinal symptoms have been discovered. To determine if NTZ could also inhibit these  
102 non-classical HAstV, we infected Caco-2 cells with VA1, treated the cells with NTZ, and at 24hpi  
103 stained for dsRNA. Again, NTZ completely inhibited VA1 replication (Figure 3b). Thus, NTZ

104 exhibits compelling potential as a treatment option across HAstV serotypes and possibly  
105 individuals experiencing extra-gastrointestinal symptoms of astrovirus infection.  
106 **NTZ reduces viral replication and clinical disease in vivo.** To determine if NTZ reduced  
107 disease, we used the only small animal model exhibiting astrovirus-induced diarrheal disease,  
108 turkey poult (15). Briefly, 5 day old turkey poult were orally gavaged with 100 mg/kg NTZ once  
109 daily for 4 days prior to oral infection with intestinal filtrate containing between  $10^{12}$ - $10^{13}$   
110 genome copy units turkey astrovirus (TAstV-2) in 500  $\mu$ l PBS and 3 days post-infection (Fig 4a).  
111 Stool samples were scored daily by four blinded volunteers as previously described (16). The  
112 scoring scale ranged from 1 to 4 based on color and consistency, with scores of 3 and 4 being  
113 considered diarrhea. Stool was also collected to quantitate viral titers. Fewer NTZ-treated poult  
114 had clinical disease (Fig 4b) and these poult had significantly less virus in their stool  
115 throughout the course of infection (Fig 4c). The poult showed no adverse symptoms from  
116 receiving NTZ alone. Excitingly, this gives evidence NTZ may be an effective therapeutic for  
117 astrovirus-induced diarrheal disease in patients.

118

## 119 **Discussion**

120 Our study provides the first evidence of an effective antiviral for astrovirus infection. We  
121 showed NTZ is broadly protective against multiple HAstV serotypes and reduces the production  
122 of dsRNA during infection *in vitro* with an  $EC_{50}$  of approximately 1.47  $\mu$ M. Additionally, we  
123 showed the potential NTZ has as a clinical therapeutic by its ability to reduce viral shed and  
124 clinical disease in our symptomatic turkey poult model.

125 Nitazoxanide, 2-acetyloxy-N-(5-nitro-2-thiazolyl) benzamide (Alinia; Romark  
126 Laboratories), is a thiazolide compound for treatment of both intestinal protozoal and helminthic  
127 infections specifically *Giardia lamblia* and *Cryptosporidium parvum* (17). Recently this  
128 compound has been shown to have antiviral properties as well. The use of NTZ *in vitro* has  
129 been reported as an antiviral against influenza virus (18), rotavirus (19), norovirus (20),

130 Japanese encephalitis virus (JEV) (21), rubella virus (22), Zika virus (23), hepatitis C virus (24),  
131 and hepatitis B virus (25). Successful clinical trials have demonstrated its effectiveness in  
132 treating influenza (26), norovirus and rotavirus (20, 27, 28), hepatitis B virus (29), and hepatitis  
133 C virus (24, 30). Its mechanism of action against protozoa is due to its interference with  
134 pyruvate:ferredoxin oxidoreductase (PFOR) enzyme-dependent electron transfer reactions (31).  
135 While its antiviral action is currently unknown, research suggests it may be through the induction  
136 of the interferon response via activation of protein kinase R, or disruption of the unfolded protein  
137 response (17). We show that NTZ disrupts astrovirus infection early in the replication cycle  
138 causing a significant decrease in the production of dsRNA. The inhibition by NTZ at an early  
139 stage of infection was also seen with JEV (21). Recent research has shown thiazolides up-  
140 regulate type I and II IFN (13), which modulate the immune system and could be how NTZ  
141 creates a broadly antiviral state. However, the rapid kinetics with which NTZ inhibits HAstV  
142 replication (Figure 2) suggests that the induction of IFN is not responsible.

143         Astroviruses are classified into genotypes, but within the classical human genotype,  
144 *Mamastrovirus 1 (MAstV1)*, strains are further divided into serotypes (HAstV-1-8) based on their  
145 antigenicity and genetic differences in the complete capsid sequence (2). These genetic  
146 differences between astrovirus serotypes can confer differences in replication kinetics and  
147 symptom severity (32). Thus, finding a compound that broadly inhibits astroviruses across  
148 genotypes and serotypes is crucial. We found that NTZ is broadly protective across multiple  
149 HAstV serotypes, including the dominant strain worldwide, HAstV-1 (33), and patient isolates.  
150 Excitingly, NTZ shows efficacy against at least one non-classical HAstV genotype, *MAstV9*,  
151 specifically the VA1 serotype (Figure 3b). Non-classical HAstV (*MAstV6, 8, and 9*) have been  
152 linked to severe extra-gastrointestinal symptoms. To date, the non-classical HAstV genotypes  
153 have been associated with eight cases of encephalitis or meningitis (11), with VA1 being  
154 identified in five of those cases. Since the 1980's, the incidence of classic HAstV has been  
155 declining (5), studies have shown seroprevalence of VA1 and MLB1 is 65% (34) and 86% (35),

156 respectively, and could account for the displacement of circulating classic HAstV. Testing the  
157 susceptibility of primary astrovirus isolates as well as non-classical HAstV to NTZ increases our  
158 confidence that this drug would be effective in a clinical setting against circulating strains of  
159 HAstV.

160 Turkey poultts exhibit age-dependent diarrhea similar to humans when infected with  
161 TAstV making them the only clinically relevant small animal model for astrovirus identified to  
162 date (15, 36). We found that NTZ reduced virus levels shed in stool. We found a significant  
163 decrease in stool viral titers with NTZ-treated poultts having nearly 2 logs less virus at 5 days  
164 post-infection. We also showed that viral titers began to plateau in the NTZ-treated poultts at 5  
165 days post-infection while untreated poultts still showed increasing titers. This suggests NTZ  
166 treatment may lead to faster clearance of the virus, however additional studies taken out further  
167 are needed to definitively prove this.

168 These studies were repeated, however, due to the seasonality of turkey breeding and  
169 limited availability of poultts, a different breed of turkey, royal palm, was used. With the royal  
170 palm poultts, we again saw a reduction of viral titer in the stool. Additionally, we tested the small  
171 intestinal tissue to quantitate viral RNA. The reduction in stool titers was recapitulated in the  
172 tissue, where NTZ-treated poultts had 2 logs lower virus in the duodenum, and about 1 log lower  
173 virus in both the jejunum and the ileum (data not shown). However, NTZ-treatment had no effect  
174 on the reduction of clinical symptoms in the royal palm poultts. The mechanism by which TAstV-  
175 2 induces diarrhea could be why this reduction was not statistically significant throughout  
176 infection. We know that administration of capsid alone is sufficient to induce diarrhea in turkey  
177 poultts (16). From our *in vitro* work we believe NTZ blocks replication around the point where the  
178 AstV genome is copied. Therefore, NTZ treatment may not be able to fully inhibit AstV-induced  
179 diarrhea. In addition to this point, we administered between  $10^{12}$ - $10^{13}$  genome copy units to  
180 each poult. While there have been reports of virus shed in humans at this level (32), it is a large  
181 viral dose that may not be representative of natural infection. This work provides the first

182 evidence that NTZ may be an effective antiviral option against a broad range of HAstV,  
183 including both classical and non-classical genotypes and limits viral titers *in vivo*.

184

## 185 **Materials and Methods**

### 186 Cells and Virus Propagation

187 The human intestinal adenocarcinoma cell line Caco-2 was obtained from ATCC (HTB-37).

188 Cells were propagated in minimum essential medium (MEM; Corning) supplemented with 20%  
189 fetal bovine serum (FBS; Benchmark), GlutaMax-I (Gibco), 1 mM sodium pyruvate (Gibco), and  
190 penicillin-streptomycin (Gibco).

191 Lab adapted human astrovirus stocks (HAstV-1, HAstV-2, HAstV-6, HAstV-8) were propagated  
192 in Caco-2 cells, and the titer of the viruses were determined on Caco-2 cells by the fluorescent-  
193 focus assay (focus-forming units [FFU]) as previously described (12).

194 Clinical isolates (SJ177.110, SJ60.212, SJ88123.E120, and SJ88027.E259) were derived from  
195 remnant fecal samples submitted for clinical diagnostic testing at St. Jude Children's Research  
196 Hospital. All samples were de-identified before testing. The St. Jude Institutional Review Board  
197 approved this study with a waiver of consent. All isolates were propagated in Caco-2 cells.

198 Briefly, a 10-20% dilution of stool extract, positive for HAstV by RT-PCR, was filtered through a  
199 0.22µm filter. The extract was diluted 1:10 in MEM + 5µg/ml porcine trypsin before adsorption  
200 onto Caco-2 cell monolayers. Following a 1 hour adsorption period at 37°C, the inoculum was  
201 removed and replaced with MEM containing 10µg/ml porcine trypsin and 0.3% BSA. The titer of  
202 the viruses were again determined on Caco-2 cells by the fluorescent-focus assay (12).

203 TAstV-2 stocks were prepared from intestines collected from infected turkey poults. Briefly,  
204 pieces of intestine were suspended in 0.5 ml PBS in multiple tubes, homogenized using 2-mm  
205 zirconium oxide beads (Next Advance) beads for 4 minutes on speed setting 4 (Next Advance  
206 air cooling bullet blender), and pelleted by centrifugation at 12,000 rpm for 5 minutes. The



207 supernatants were pooled and filtered through a 0.2- $\mu$ m filter (fecal filtrate), and viral copy  
208 number was quantified by real-time RT-PCR.

209

### 210 *In vitro* HAstV Infection

211 Briefly,  $5 \times 10^4$  cells were seeded into 96-well tissue culture plates (Corning), and after 2 days,  
212 the cells were inoculated with virus (HAstV-1, clinical isolates, VA1) in serum-free MEM for 1  
213 hour at 37°C, at which time the virus was replaced with MEM containing 0.3% BSA and infection  
214 was allowed to proceed until 24hpi unless otherwise stated.

215 NTZ treatment was carried out in serum-free MEM and added following the 1 hour virus  
216 adsorption period unless otherwise stated in the experimental design.

217

### 218 Immunofluorescent Staining

219 Cells were fixed with 100% ice-cold methanol for 15 minutes, and then blocked with 5% normal  
220 goat serum (NGS; Gibco) in PBS at room temperature. The cells were stained with HAstV  
221 mouse monoclonal antibody 8E7 (2  $\mu$ g/ml DakoCytomation) for 1 hour at room temperature  
222 followed by anti-mouse IgG labeled with Alexa Fluor 488 (anti-mouse IgG-Alexa Fluor 488;  
223 Invitrogen) secondary antibodies and 4',6'-diamidino-2-phenylindole (DAPI; Sigma) for 30  
224 minutes at room temperature. Staining was imaged on EVOS® FL Cell Imaging System and  
225 analyzed using ImageJ 1.50i software.

226

### 227 MTT Cell Viability Assay

228 Cell viability was tested using an MTT Cell Proliferation assay kit (Abcam) according to the  
229 manufacturer protocol. Briefly, cells were treated with varying concentrations of nitazoxanide in  
230 serum free media for 24 hours. The nitazoxanide containing media was removed and replaced  
231 with a 50:50 mixture of MTT reagent and serum free media. The cells were incubated with the  
232 mixture at 37°C for 3 hours. Following incubation, an MTT solvent solution was added and the

233 plate was placed on an orbital shaker for 15 minutes. The absorbance was then measured at  
234 OD595. Cell viability was calculated as a percentage of non-treated cells.

235

### 236 Animals and NTZ treatment

237 Broad-breasted white turkey poults were obtained from a commercial hatchery. Five-day-old  
238 poults were randomly assigned to groups (n = 6 per group) and housed in individual,  
239 temperature-controlled Horsfall units with HEPA-filtered inlet and exhaust air valves, where they  
240 were given free access to water and routine turkey starter feed. Poults were orally inoculated  
241 with 500µl of TAstV-2 intestinal filtrate, containing approximately  $10^{12}$ - $10^{13}$  genome copies, or  
242 PBS alone. Stool from individual birds was scored from 1 to 4. Scoring was performed daily  
243 post-infection. Scores of 3 (liquid or loose stool with some undigested food or solid material) and  
244 4 (watery stool with no solids present) were defined as diarrhea, in accordance with previously  
245 published work from Meliopoulos et al. (16).

246 For NTZ treatment, poults were orally administered 100mg/kg nitazoxanide in 500ul of ultra-  
247 pure water. Administration of NTZ was carried out 4 days prior to infection and 3 days post-  
248 infection.

249

### 250 Turkey Astrovirus qRT-PCR assay

251 TAstV-2 genome copies were determined as previously described (16). Briefly, viral RNA was  
252 isolated from 10% stool by the MagMAX-96 AI/ND Viral RNA Isolation Kit (Applied Biosystems)  
253 according to the manufacturer's protocol. PCR was performed on 3 µl of each sample using  
254 TaqMan™ Fast Virus 1-Step Master Mix (Applied Biosciences) with 600nM forward primer  
255 5'GACTGAAATAAGGTCTGCACAGGT, 600nM reverse primer 5'AACCTGCGAACCCCTGCG,  
256 and 200nM probe 6-carboxyfluorescein (6FAM)-ATGGACCCCTTTTTTCGGCGG-BHQ1 (black  
257 hole quencher) under the following conditions: 50°C for 5 min, 95°C for 20 s, followed by 45  
258 cycles, with one cycle consisting of 95°C for 3 s and 60°C for 30 s on a Bio-Rad CFX96 real-

259 time PCR detection system. The number of genome copies/ $\mu$ L of total RNA was determined  
260 using a standard curve generated from a synthesized TAstV-2 DNA from nucleotides 4001 to  
261 4201 with a known copy number (calculated using Thermo Fisher Scientific DNA Copy Number  
262 and Dilution Calculator). Log<sub>10</sub> dilutions of the synthesized TAstV-2 DNA were used for real-time  
263 RT-PCR as described above.

264

## 265 **Acknowledgments**

266 We thank Rebekah Honce, Pamela Freiden and Dr. Victoria Meliopoulos for their expert poop  
267 scoring abilities; Sean Offord and Sharon Lokey from the St. Jude Animal Resources Center for  
268 assistance with turkey studies; and Dr. David Wang for graciously providing VA1 for these  
269 studies.

270 These studies were funded by National Institute of Allergy and Infectious Diseases R21  
271 AI135254-01, and ALSAC.

272

## 273 **References**

- 274 1. World Health Organization. 2017. Diarrhoeal Disease Fact Sheet.
- 275 2. Bosch A, Pintó RM, Guix S. 2014. Human Astroviruses. *Clin Microbiol Rev* 27:1048–1074.
- 276 3. Méndez-Toss M, Griffin DD, Calva J, Contreras JF, Puerto FI, Mota F, Guiscafré H, Cedillo R, Muñoz  
277 O, Herrera I, López S, Arias CF. 2004. Prevalence and Genetic Diversity of Human Astroviruses in  
278 Mexican Children with Symptomatic and Asymptomatic Infections. *J Clin Microbiol* 42:151–157.
- 279 4. Kurtz JB, Lee TW, Craig JW, Reed SE. 1979. Astrovirus infection in volunteers. *J Med Virol* 3:221–  
280 230.

- 281 5. Bosch A, Guix S, Pintó RM. 2013. Epidemiology of Human Astroviruses, p. 1–18. *In* Schultz-Cherry, S  
282 (ed.), *Astrovirus Research: Essential Ideas, Everyday Impacts, Future Directions*. Springer New York,  
283 New York, NY.
- 284 6. Lin H-C, Kao C-L, Chang L-Y, Hsieh Y-C, Shao P-L, Lee P-I, Lu C-Y, Lee C-Y, Huang L-M. 2008.  
285 *Astrovirus gastroenteritis in children in Taipei*. *J Formos Med Assoc* 107:295–303.
- 286 7. Tseng W-C, Wu F-T, Hsiung CA, Chang W-C, Wu H-S, Wu C-Y, Lin J-S, Yang S-C, Hwang K-P, Huang Y-  
287 C. 2012. *Astrovirus gastroenteritis in hospitalized children of less than 5 years of age in Taiwan,*  
288 *2009*. *J Microbiol Immunol Infect* 45:311–317.
- 289 8. Amaral MSC, Estevam GK, Penatti M, Lafontaine R, Lima ICG, Spada PKP, Gabbay YB, Matos NB.  
290 2015. *The prevalence of norovirus, astrovirus and adenovirus infections among hospitalised*  
291 *children with acute gastroenteritis in Porto Velho, state of Rondônia, western Brazilian Amazon.*  
292 *Mem Inst Oswaldo Cruz* 110:215–221.
- 293 9. Ueda Y, Nakaya S, Takagi M, Ushijima H. 1996. [Diagnosis and clinical manifestations of diarrheal  
294 virus infections in Maizuru area from 1991 to 1994--especially focused on small round structured  
295 viruses]. *Kansenshogaku Zasshi* 70:1092–1097.
- 296 10. Cordey S, Zanella M-C, Wagner N, Turin L, Kaiser L. 2018. *Novel human astroviruses in pediatric*  
297 *respiratory samples: A one-year survey in a Swiss tertiary care hospital*. *J Med Virol* 90:1775–1778.
- 298 11. Vu D-L, Cordey S, Brito F, Kaiser L. 2016. *Novel human astroviruses: Novel human diseases?* *Journal*  
299 *of Clinical Virology* 82:56–63.
- 300 12. Marvin S, Meliopoulos V, Schultz-Cherry S. 2014. *Human Astrovirus Propagation, Purification and*  
301 *Quantification*. *BIO-PROTOCOL* 4.

- 302 13. Trabattoni D, Gnudi F, Ibba SV, Saulle I, Agostini S, Masetti M, Biasin M, Rossignol J-F, Clerici M.  
303 2016. Thiazolides Elicit Anti-Viral Innate Immunity and Reduce HIV Replication. *Scientific Reports*  
304 6:27148.
- 305 14. Marvin SA, Huerta CT, Sharp B, Freiden P, Cline TD, Schultz-Cherry S. 2015. Type I Interferon  
306 Response Limits Astrovirus Replication and Protects against Increased Barrier Permeability In Vitro  
307 and In Vivo. *J Virol* 90:1988–1996.
- 308 15. Koci MD, Moser LA, Kelley LA, Larsen D, Brown CC, Schultz-Cherry S. 2003. Astrovirus induces  
309 diarrhea in the absence of inflammation and cell death. *J Virol* 77:11798–11808.
- 310 16. Meliopoulos VA, Marvin SA, Freiden P, Moser LA, Nighot P, Ali R, Blikslager A, Reddivari M, Heath  
311 RJ, Koci MD, Schultz-Cherry S. 2016. Oral Administration of Astrovirus Capsid Protein Is Sufficient  
312 To Induce Acute Diarrhea In Vivo. *MBio* 7.
- 313 17. Rossignol J-F. 2014. Nitazoxanide: A first-in-class broad-spectrum antiviral agent. *Antiviral*  
314 *Research* 110:94–103.
- 315 18. Rossignol JF, La Frazia S, Chiappa L, Ciucci A, Santoro MG. 2009. Thiazolides, a new class of anti-  
316 influenza molecules targeting viral hemagglutinin at the post-translational level. *J Biol Chem*  
317 284:29798–29808.
- 318 19. Rossignol J-F, Abu-Zekry M, Hussein A, Santoro MG. 2006. Effect of nitazoxanide for treatment of  
319 severe rotavirus diarrhoea: randomised double-blind placebo-controlled trial. *Lancet* 368:124–129.
- 320 20. Rossignol J-F, El-Gohary YM. 2006. Nitazoxanide in the treatment of viral gastroenteritis: a  
321 randomized double-blind placebo-controlled clinical trial. *Alimentary Pharmacology &*  
322 *Therapeutics* 24:1423–1430.

- 323 21. Shi Z, Wei J, Deng X, Li S, Qiu Y, Shao D, Li B, Zhang K, Xue F, Wang X, Ma Z. 2014. Nitazoxanide  
324 inhibits the replication of Japanese encephalitis virus in cultured cells and in a mouse model. *Virology*  
325 11:10.
- 326 22. Perelygina L, Hautala T, Seppänen M, Adebayo A, Sullivan KE, Icenogle J. 2017. Inhibition of rubella  
327 virus replication by the broad-spectrum drug nitazoxanide in cell culture and in a patient with a  
328 primary immune deficiency. *Antiviral Res* 147:58–66.
- 329 23. Li Z, Brecher M, Deng Y-Q, Zhang J, Sakamuru S, Liu B, Huang R, Koetzner CA, Allen CA, Jones SA,  
330 Chen H, Zhang N-N, Tian M, Gao F, Lin Q, Banavali N, Zhou J, Boles N, Xia M, Kramer LD, Qin C-F, Li  
331 H. 2017. Existing drugs as broad-spectrum and potent inhibitors for Zika virus by targeting NS2B-  
332 NS3 interaction. *Cell Res* 27:1046–1064.
- 333 24. Rossignol J, Elfert A, El-Gohary Y, Keeffe EB. 2009. Improved Virologic Response in Chronic  
334 Hepatitis C Genotype 4 Treated With Nitazoxanide, Peginterferon, and Ribavirin. *Gastroenterology*  
335 136:856–862.
- 336 25. Korba BE, Montero AB, Farrar K, Gaye K, Mukerjee S, Ayers MS, Rossignol J-F. 2008. Nitazoxanide,  
337 tizoxanide and other thiazolides are potent inhibitors of hepatitis B virus and hepatitis C virus  
338 replication. *Antiviral Res* 77:56–63.
- 339 26. Haffizulla J, Hartman A, Hoppers M, Resnick H, Samudrala S, Ginocchio C, Bardin M, Rossignol J-F.  
340 2014. Effect of nitazoxanide in adults and adolescents with acute uncomplicated influenza: a  
341 double-blind, randomised, placebo-controlled, phase 2b/3 trial. *The Lancet Infectious Diseases*  
342 14:609–618.

- 343 27. Teran CG, Teran-Escalera CN, Villarroel P. 2009. Nitazoxanide vs. probiotics for the treatment of  
344 acute rotavirus diarrhea in children: a randomized, single-blind, controlled trial in Bolivian children.  
345 *International Journal of Infectious Diseases* 13:518–523.
- 346 28. Siddiq DM, Koo HL, Adachi JA, Viola GM. 2011. Norovirus gastroenteritis successfully treated with  
347 nitazoxanide. *Journal of Infection* 63:394–397.
- 348 29. Rossignol J-F, Keeffe EB. 2008. Thiazolides: a new class of drugs for the treatment of chronic  
349 hepatitis B and C. *Future Microbiol* 3:539–545.
- 350 30. Rossignol J-F, Elfert A, Keeffe EB. 2010. Treatment of chronic hepatitis C using a 4-week lead-in  
351 with nitazoxanide before peginterferon plus nitazoxanide. *Journal of Clinical Gastroenterology*  
352 44:504–509.
- 353 31. Hoffman PS, Sisson G, Croxen MA, Welch K, Harman WD, Cremades N, Morash MG. 2007.  
354 Antiparasitic drug nitazoxanide inhibits the pyruvate oxidoreductases of *Helicobacter pylori*,  
355 selected anaerobic bacteria and parasites, and *Campylobacter jejuni*. *Antimicrob Agents*  
356 *Chemother* 51:868–876.
- 357 32. Caballero S, Guix S, El-Senousy WM, Calicó I, Pintó RM, Bosch A. 2003. Persistent gastroenteritis in  
358 children infected with astrovirus: association with serotype-3 strains. *J Med Virol* 71:245–250.
- 359 33. Vu D-L, Bosch A, Pintó RM, Guix S. 2017. Epidemiology of Classic and Novel Human Astrovirus:  
360 Gastroenteritis and Beyond. *Viruses* 9.
- 361 34. Burbelo PD, Ching KH, Esper F, Iadarola MJ, Delwart E, Lipkin WI, Kapoor A. 2011. Serological  
362 studies confirm the novel astrovirus HMOAstV-C as a highly prevalent human infectious agent.  
363 *PLoS ONE* 6:e22576.

- 364 35. Holtz LR, Bauer IK, Jiang H, Belshe R, Freiden P, Schultz-Cherry SL, Wang D. 2014. Seroepidemiology  
365 of astrovirus MLB1. *Clin Vaccine Immunol* 21:908–911.
- 366 36. Schultz-Cherry S, Kapczynski DR, Simmons VM, Koci MD, Brown C, Barnes HJ. 2000. Identifying  
367 agent(s) associated with poult enteritis mortality syndrome: importance of the thymus. *Avian Dis*  
368 44:256–265.

369

## 370 **Figure Legends**

371 **Figure 1 | Nitazoxanide inhibits HAstV-1 replication in Caco-2 cells.** (A) Caco-2 cells were  
372 infected with HAstV-1 at an MOI of 1 and treated with a panel of antivirals (foscarnet, ribavirin,  
373 acyclovir, and nitazoxanide) at the indicated concentrations. At 24hpi, cells were fixed and  
374 stained with DAPI (blue) and for the presence of astrovirus capsid protein (green). (B) The  
375 percent of infected cells was calculated and compared to non-treated cells. (C) Non-linear  
376 regression analysis of percent infection data was used to determine the 50% effective  
377 concentration ( $EC_{50}$ ). (D) Cell viability of Caco-2 cells following 24 hour treatment with NTZ  
378 (green bars) or vehicle alone (DMSO; black bars) at the indicated concentrations was  
379 determined by MTT assay. All error bars indicate standard error of the means.

380

381 **Figure 2 | Nitazoxanide inhibits HAstV-1 replication in vitro when added up to 8 hpi.** Caco-  
382 2 cells were infected with HAstV-1 and at the various times post-infection 2.5 $\mu$ M NTZ or vehicle  
383 alone (DMSO) was added as indicated by the schematic in panel A. (B) At 24hpi, cells were  
384 fixed and stained with DAPI (blue) and for the presence of astrovirus capsid protein (green). (C)  
385 At 10hpi, cells were fixed and stained with DAPI (blue) and for the presence of dsRNA (green).  
386 (D) Quantification of the percent of cells with capsid staining from panel B. (E) Quantification of  
387 the percent of cells with dsRNA staining from panel C. (F) Real-time RT-PCR for IFN $\alpha$ , IFN $\beta$ ,



388 and IFN $\lambda$  was performed on RNA was collected from Caco-2 cells treated with 2.5 $\mu$ M NTZ and  
389 normalized to GAPDH. Results are shown as fold increase over untreated cells and error bars  
390 indicate standard error of the means.

391

392 **Figure 3 | Nitazoxanide inhibits the replication of multiple serotypes and clinical isolates**

393 **of human astrovirus.** (A) Caco-2 cells were infected with lab adapted virus serotypes (upper  
394 panels) or clinical isolates (lower panels) and treated with 2.5 $\mu$ M NTZ or vehicle alone (DMSO).  
395 At 24hpi, cells were fixed and stained with DAPI (blue) and for the presence of astrovirus capsid  
396 protein (green). (B) Caco-2 cells infected with VA1 were fixed at 24hpi and stained with DAPI  
397 (blue) and for the presence of dsRNA (green).

398

399 **Figure 4 | Nitazoxanide reduces clinical symptoms and viral titers in turkey poults.** (A)

400 Turkey poults (n=6/group) were infected with turkey astrovirus (TAsV-2) from intestinal filtrate.  
401 Four days prior to infection and three days post-infection poults were treated with NTZ. Poults  
402 were monitored for clinical score daily and stool was collected to measure viral RNA titer every  
403 other day. (B) Percentage of poults with clinical scores of 3 or higher in the groups: NTZ  
404 treatment alone (green circle), no antiviral treatment (gray square), TAsV-2 infected without  
405 antiviral treatment (black triangle), and TAsV-2 infected with NTZ treatment (green triangle). (C)  
406 Viral RNA titer of stool collected from infected poults with NTZ treatment (green triangles) or no  
407 antiviral treatment (black triangles). All error bars indicate standard error of the means, and  
408 dashed line represents the limit of detection.

409

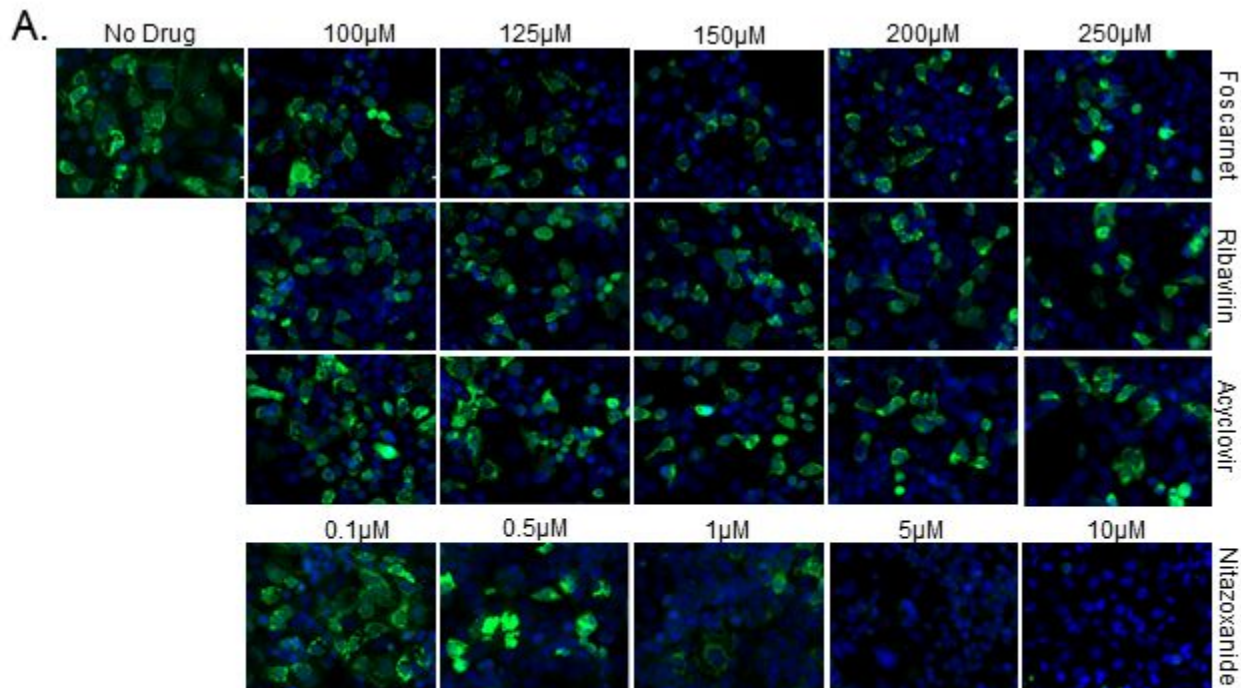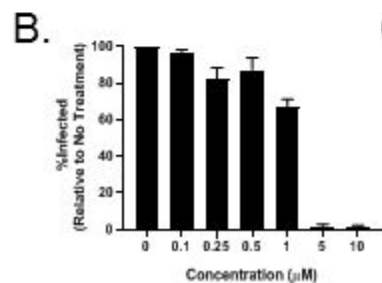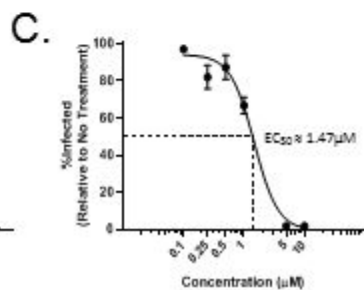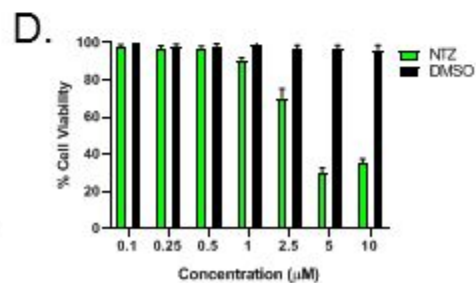

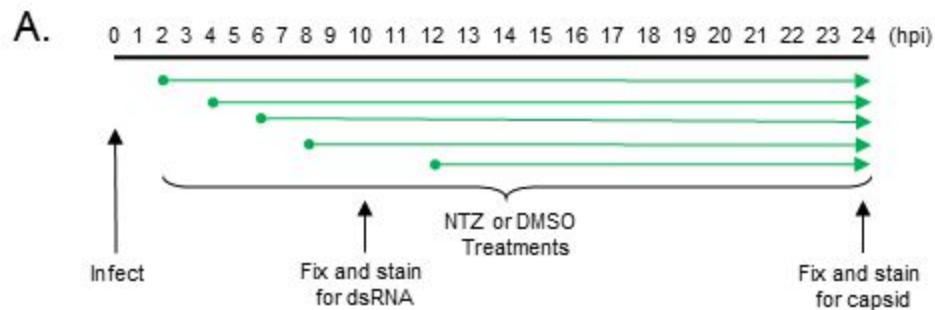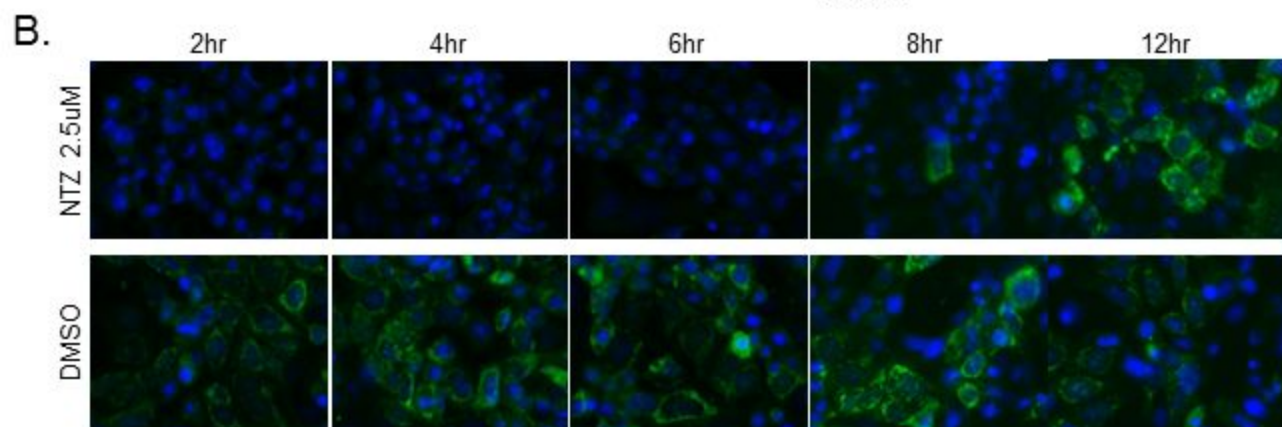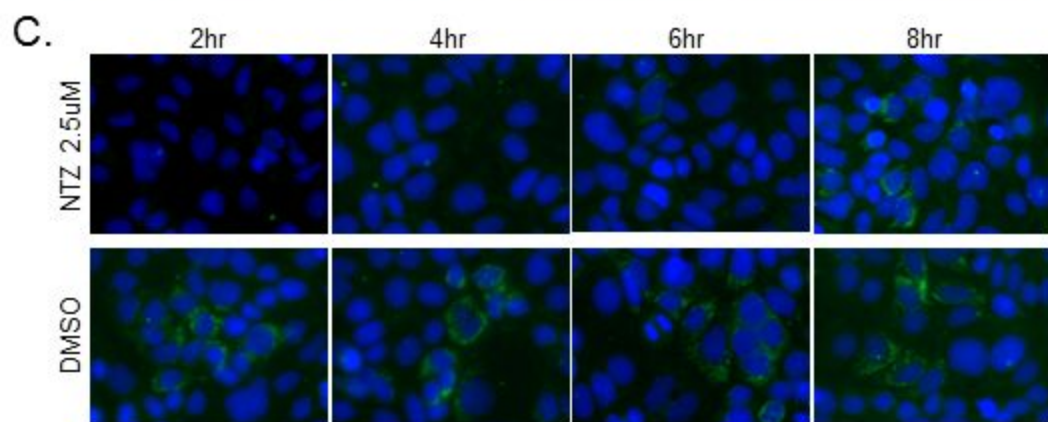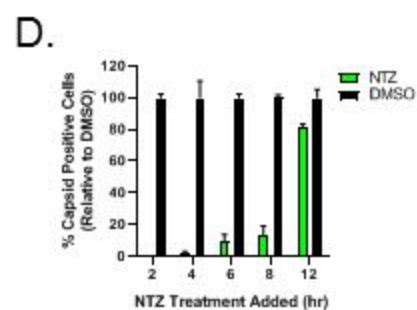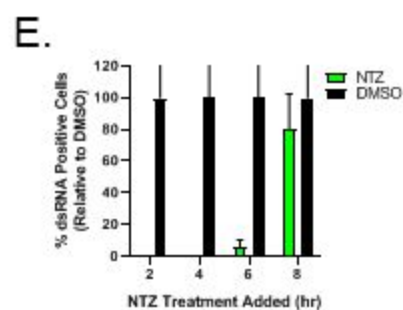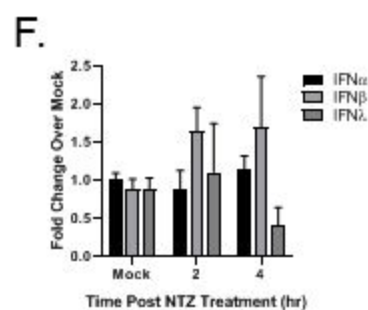

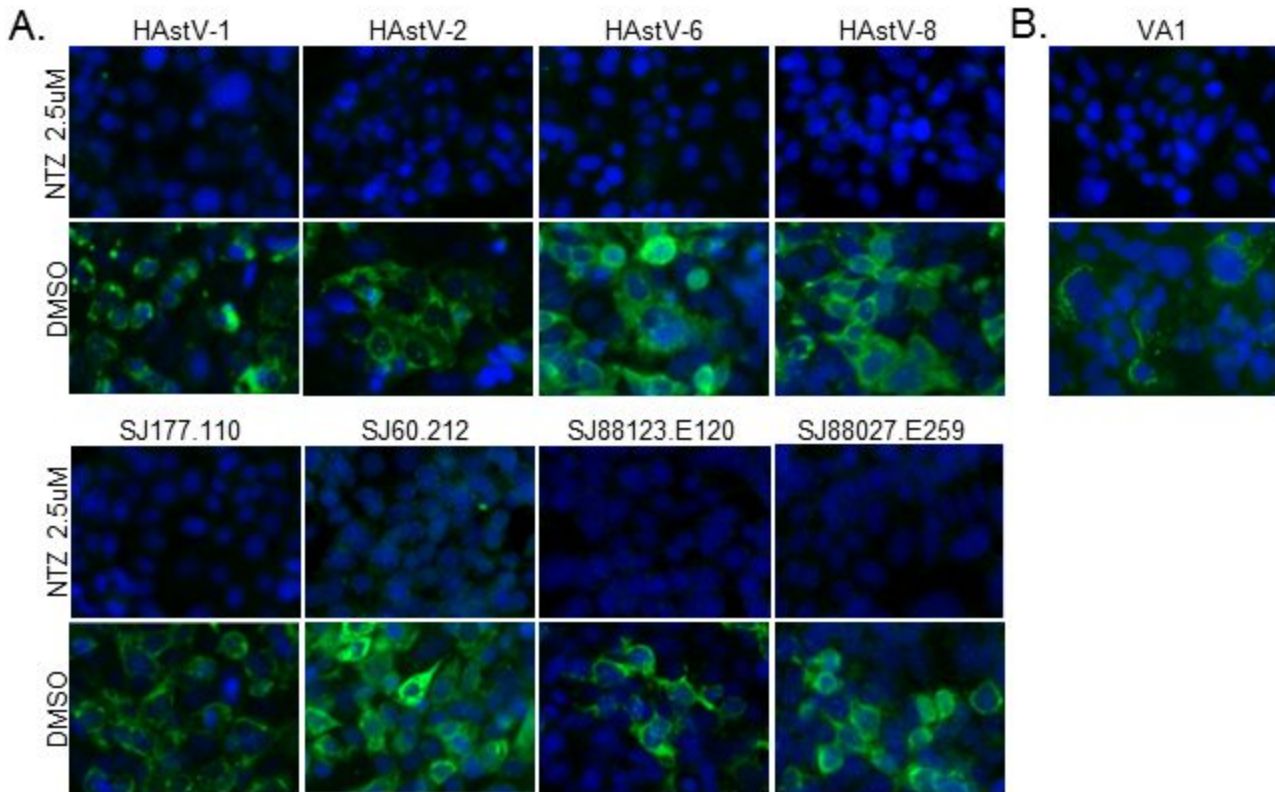

A.

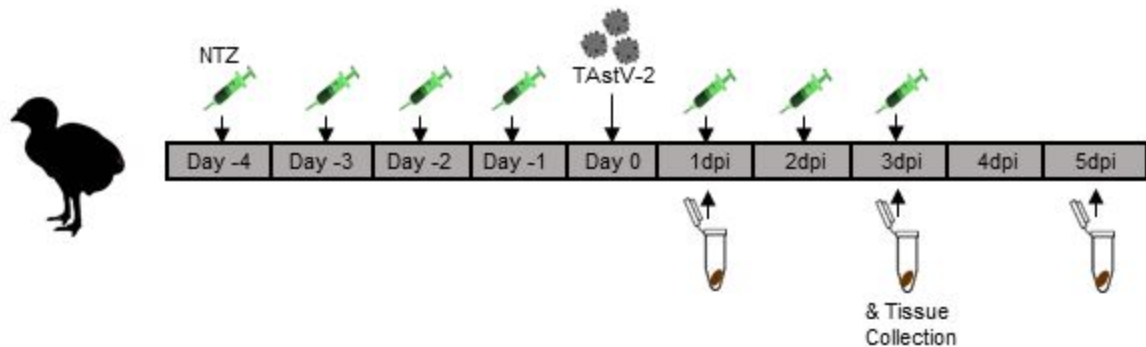

B.

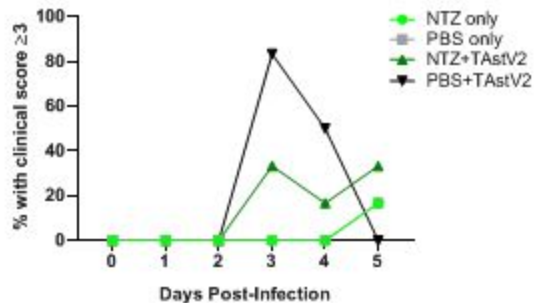

C.

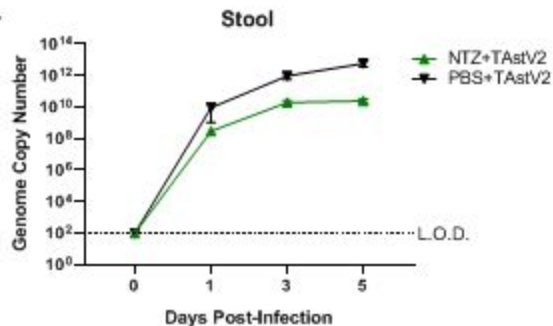

Source: https://www.biorxiv.org/content/10.1101/797316v1.full.pdf
